# Supplementary material
Source: PubMed Central journal article supplement (PMC4795047)
Supplement: ejhg2014172x3.pdf [file ejhg2014172x3.pdf]

**Supplementary Table 4:**

**Panel A:** This table summarizes the results of a forward logistic regression on all the 49,035 variants tested together. Significance was defined by Bonferroni correction for multiple testing ( $0.05/49,035 \sim 1 \times 10^{-6}$ ). The green shaded rows represent two markers which marginally missed the p-value cut-off but were still included since the Bonferroni cut-off might be too conservative given the high dependence between the markers tested. This table shows the multi-variate results, i.e. all the variants in the table together in a model.

**Panel B:** This table lists the best variants of each type at each step of the forward conditional regression in Panel A. The yellow shaded variants denote the best signals found in Panel A. An asterisk (\*) beside an HLA allele denotes the allele was protective. This table shows the stepwise univariate results, i.e. each row has the variants in that row and all the previous rows.

**(A). Forward Regression Results for all 49,035 variants together - Multivariate Results**

| Variants (Risk: Non-Risk Allele) | Odds Ratio | P-Value  | Risk AF Case/Ctrl | Total AF |
|----------------------------------|------------|----------|-------------------|----------|
| rs114255771 (G:A)                | 3.45       | 1.88E-48 | 0.19/ 0.08        | 0.85     |
| rs6924962 (C:T)                  | 1.51       | 1.58E-13 | 0.36/ 0.23        | 0.3      |
| rs1059514 (A:G)                  | 1.49       | 3.12E-18 | 0.45/ 0.37        | 0.41     |
| HLA-B:116:Phe, Asp               | 1.28       | 1.06E-06 | 0.73/ 0.63        | 0.67     |
| rs56673893 (C:T)                 | 1.75       | 1.12E-06 | 0.96/ 0.94        | 0.95     |

**(B). Forward Regression Results for all 49,035 variants together - Stepwise univariate Results**

| Single Nucleotide Polymorphisms |            |          | Amino Acid Residues |            |          | 4-Digit HLA Allele |            |          | 2-Digit Allele |            |          |
|---------------------------------|------------|----------|---------------------|------------|----------|--------------------|------------|----------|----------------|------------|----------|
| Variants (Risk:Non-Risk Allele) | Odds Ratio | P-Value  | Amino Acid Residues | Odds Ratio | P-Value  | HLA Alleles        | Odds Ratio | P-Value  | HLA Alleles    | Odds Ratio | P-Value  |
| rs114255771 (G:A)               | 4.04       | 2.56E-66 | HLA-C (Trp156)      | 2.24       | 8.63E-54 | HLA-C*06:02        | 2.84       | 1.93E-55 | HLA-C*06       | 2.84       | 1.92E-55 |
| rs6924962 (C:T)                 | 1.55       | 3.40E-16 | HLA-B (Cys67)       | 1.64       | 1.19E-14 | HLA-A*02:01        | 1.32       | 1.57E-08 | HLA-A*02       | 1.32       | 6.34E-09 |
| rs1059514 (A:G)                 | 1.42       | 6.17E-15 | HLA-A (Val95)       | 1.39       | 3.76E-11 | HLA-A*02:01        | 1.37       | 3.10E-10 | HLA-A*02       | 1.37       | 1.01E-10 |
| rs56673893 (C:T)                | 1.69       | 4.67E-06 | HLA-B (Phe,Asp116)  | 1.26       | 4.40E-06 | HLA-A*68:01 (*)    | 1.72       | 5.35E-05 | HLA-A*68 (*)   | 1.62       | 7.01E-05 |
| rs56673893 (C:T)                | 1.75       | 1.12E-06 | HLA-A (Ala245)      | 1.72       | 9.38E-06 | HLA-A*68:01 (*)    | 1.80       | 1.32E-05 | HLA-A*68 (*)   | 1.71       | 1.31E-05 |
